# Supplementary material for: TIAToolbox as an end-to-end library for advanced tissue image analytics
Source: PubMed Central journal article supplement (PMC9509319; doi:10.1038/s43856-022-00186-5), 2022-09-24
Supplement: 43856_2022_186_MOESM1_ESM.pdf [file 43856_2022_186_MOESM1_ESM.pdf]

# Supplementary Material

## Supplementary Note 1

```
001 # Implementation without TIAToolbox (16 lines)
002 import numpy as np
003 import openslide
004
005 PATCH_SIZE = (224, 224)
006
007 slide = openslide.OpenSlide("CMU-1-Small-Region.svs")
008 mpp = np.array([
009     float(slide.properties["openslide.mpp-x"]),
010     float(slide.properties["openslide.mpp-y"]),
011 ])
012 target_mpp = np.ones(2)
013 scale_factor = target_mpp / mpp
014 read_patch_size = np.multiply(PATCH_SIZE, scale_factor).astype(int)
015 mosaic_shape = np.divide(slide.dimensions, read_patch_size).astype(int)
016
017 for ij in np.ndindex(tuple(mosaic_shape)):
018     xy = (np.multiply(ij, PATCH_SIZE) * scale_factor).astype(int)
019     patch = slide.read_region(tuple(xy), 0, tuple(read_patch_size)).convert("RGB")
020     patch = patch.resize(PATCH_SIZE)
021     if np.percentile(np.mean(patch, axis=-1), 5) > 200:
022         continue
023     patch.save(f"patches/{'-'.join(str(c) for c in xy)}.jpeg")
024
025 # TIAToolbox based implementation (5 lines)
026 from tiatoolbox.tools.patchextraction import SlidingWindowPatchExtractor
027 from matplotlib import pyplot as plt
028
029 extractor = SlidingWindowPatchExtractor(
030     "CMU-1-Small-Region.svs",
031     (224, 224),
032     resolution=1,
033     units="mpp",
034 )
035 for n, patch in enumerate(extractor):
036     plt.imsave(f"patches/{n}.jpeg", patch)
```

*Source code demonstrating how the toolbox can simplify implementation of a common task such as patch extraction. The implementation without using TIAToolbox has 16 lines of code, and the implementation with TIAToolbox has only 5 lines of code. Additionally, the implementation without the toolbox does not work with formats which are not supported by OpenSlide, whereas the version using the TIAToolbox extractor class supports many more WSI file types.*

## Supplementary Note 2

```
037 from tiatoolbox.wsicore.wsireader import WSIREader
038
039 tissue = WSIREader.open("path/wsi1.svs")
040 mask = tissue.tissue_mask()
041
042 tissue_region, mask_region = (
043     wsi.read_rect(
044         location=(0, 0),
045         size=(512, 512),
046         resolution=0.5,
047         units="mpp",
048     )
049     for wsi in (tissue, mask)
050 )
```

*A short Python expression demonstrating a synchronous reading of a tissue WSI and a lower resolution mask derived from the tissue WSI. Both read operations use the same function call arguments coordinates, including identical coordinates, as shown on lines 008 through 011. This is despite the underlying image data being stored at different resolutions. This demonstrates the power of the VirtualWSIREader object to enable easy reading from both a WSI and a derived image, such as a tissue mask, which may be internally represented at a different resolution.*

## Supplementary Note 3

```
051 from tiatoolbox.models.engine.patch_predictor import PatchPredictor
052
053 data = [img1, img2] # input arrays as a list
054 predictor = PatchPredictor(
055     pretrained_model="resnet18-kather100k",
056 )
057 output = predictor.predict(
058     data,
059     mode="patch",
060 )
```

*An example Python script for patch prediction using TIAToolbox using pre-extracted patches as input.*

## Supplementary Note 4

```
061 from tiatoolbox.models.engine.patch_predictor import PatchPredictor
062
063 # Input WSI file paths
064 data = ["path/wsi1.svs", "path/wsi2.svs"]
065
066 predictor = PatchPredictor(
067     pretrained_model="resnet18-kather100k"
068 )
069
070 output = predictor.predict(
071     data,
072     mode="wsi",
073 )
```

*An example Python script for patch prediction using TIAToolbox using whole-slide images as input. The same API is used for image tiles by changing the mode to "tile" in the predict method.*

## Supplementary Note 5

```
074 from tiatoolbox.models.engine.semantic_segmentor import SemanticSegmentor
075
076 # Input WSI file paths
077 data = ["path/wsi1.svs", "path/wsi2.svs"]
078
079 segmentor = SemanticSegmentor(
080     pretrained_model="fcn_resnet50_unet-bcss",
081 )
082
083 # WSI prediction
084 output = segmentor.predict(
085     imgs=[wsi_file_name],
086     mode="wsi",
087 )
```

*Supplying a WSI as input to a semantic segmentation model. Here, we use a U-Net with a ResNet50 backbone that is trained on the breast cancer semantic segmentation (BCSS) dataset.*

## Supplementary Note 6

```
088 from tiatoolbox.models.engine.nucleus_instance_segmentor import NucleusInstanceSegmentor
089
090 # Input WSI file paths
091 data = ["path/wsi1.svs", "path/wsi2.svs"]
092
093 # Instantiate the nucleus instance segmentor
094 inst_segmentor = NucleusInstanceSegmentor(
095     pretrained_model="hovernet_fast-pannuke",
096 )
097
098 # WSI prediction
099 wsi_output = inst_segmentor.predict(
100     [wsi_file_name],
101     mode="wsi",
102 )
```

*Supplying a WSI to a nucleus instance segmentation model. Here, we use a HoVer-Net trained on the PanNuke dataset.*

## Supplementary Note 7

```
103 from tiatoolbox.models.engine.patch_predictor import PatchPredictor
104
105 predictor = PatchPredictor(
106     pretrained_model="resnet18-kather100k",
107     pretrained_weights="path/weights.pth",
108 )
```

*Code showing Python script of how to use your own pretrained weights, rather than those provided by TIAToolbox.*

## Supplementary Note 8

```
109 import numpy as np
110 from matplotlib import pyplot as plt
111
112 from tiatoolbox.tools.graph import SlideGraphConstructor
113
114 # Load XY patch positions in the WSI
115 positions = np.load(f"path/wsi1.position.npy")
116 # Load features for each patch
117 features = np.load(f"path/wsi1.features.npy")
118
119 constructor = SlideGraphConstructor()
120 graph = constructor.build(
121     positions[:, :2],
122     features,
123     feature_range_thresh=None,
124 )
125
126 constructor.visualise(graph)
127 plt.show()
```

*Building and visualizing a slide graph from a set of patch locations and associated features.*

## Supplementary Note 9

```
128 from tiatoolbox.wsiscore.wsireader import WSIREader
129 from tiatoolbox.visualization.tileservers import TileServer
130
131 wsi = WSIREader.open("path/wsi1.svs")
132 app = TileServer(
133     title="Testing TileServer",
134     layers={
135         "wsi1": wsi,
136     },
137 )
138 app.run()
```

*Creating a tile server web server gateway interface (WSGI) application and running a simple development HTTP server to display two WSI images in a web browser.*

## Supplementary Note 10

```
139 from shapely.geometry import Polygon
140 from tiatoolbox.annotation.storage import SQLiteStore, Annotation
141
142 # Store a simple triangle annotation
143 store = SQLiteStore("annotations.db")
144 annotation = Annotation(
145     geometry=Polygon([(0, 0), (1, 0), (0, 1)]),
146     properties={},
147 )
148 uuid = store.append(annotation)
149
150 # Access the annotation and add some properties
151 print(store[uuid])
152 annotation.properties = {"class": 1, "foo": "bar"}
153 store[uuid] = Annotation(annotation)
154
155 # Change just part of the properties
156 store.patch(uuid, {"class": 2})
157
158 # Query in a bounding box (left, right, top, bottom)
159 uuids = store.iquery([0, 0, 1, 1])
160
161 # Query with a predicate statement
162 results = store.query([0, 0, 1, 1], where="props['class']=2")
```

*An example of creating an annotation and storing it in an SQLite database. The annotation is given a universally unique identifier (UUID) as no key was specified. This is used to look up the annotation and modify it. Also shown here, is how to query for annotations using a bounding box and adding a predicate statement to filter the results.*

## Supplementary Note 11

```
163 import numpy as np
164
165 from tiatoolbox.models.engine.patch_predictor import PatchPredictor
166 from tiatoolbox.utils.misc import imwrite
167
168 WSI_PATH = "path/wsi1.svs"
169
170 # Tumour detection
171 tumour_predictor = PatchPredictor(
172     pretrained_model='resnet18-idars-tumour',
173 )
174
175 tumour_output = tumour_predictor.predict(
176     imgs=[WSI_PATH],
177     mode='wsi',
178 )
179
180 tumour_mask = tumour_predictor.merge_predictions(
181     WSI_PATH,
182     tumour_output[0],
183     resolution=5,
184     units="power",
185 )
186 tumour_mask = tumour_mask == 2 # Binarise the output
187 imwrite('tumour_mask.png', tumour_mask.astype('uint8'))
188
189 # WSI Prediction
190 msi_predictor = PatchPredictor(
191     pretrained_model='resnet34-idars-msi',
192 )
193
194 msi_output = msi_predictor.predict(
195     imgs=[WSI_PATH],
196     masks=['tumour_mask.png'],
197     mode='wsi',
198     return_probabilities=True,
199 )
200
201 # Slide-Level Score:
202 # Only consider MSI class
203 msi_probabilities = np.array(msi_output[0]['probabilities'])[...,1]
204 # Get the average over all tumour tiles
205 average_msi_probability = np.mean(msi_probabilities)
```

*IDaRS inference using TIAToolbox. Here, we demonstrate that we can simplify the overall inference pipeline without the need for many lines of code. The following steps are performed: 1) tumor detection, 2) saving tumor mask, 3) mutation prediction in tumor regions and 4) patch aggregation.*

## Supplementary Table 1

*Detailed metrics of Models for patch prediction.*

| <b>Model Family</b>            | <b>Architecture Variants</b>                                | <b>Training Dataset(s)</b>                      | <b>Metric(s)</b>      |
|--------------------------------|-------------------------------------------------------------|-------------------------------------------------|-----------------------|
| <b>AlexNet<sup>1</sup></b>     | AlexNet                                                     | Kather 100k <sup>2</sup> ,<br>PCam <sup>3</sup> | Supplementary Table 2 |
| <b>ResNet<sup>4</sup></b>      | ResNet-18,<br>ResNet-34,<br>ResNet-50,<br>ResNet-101        | Kather 100k <sup>2</sup> ,<br>PCam <sup>3</sup> | Supplementary Table 2 |
| <b>ResNeXt<sup>5</sup></b>     | ResNeXt-50,<br>ResNeXt-101                                  | Kather 100k <sup>2</sup> ,<br>PCam <sup>3</sup> | Supplementary Table 2 |
| <b>Wide ResNet<sup>6</sup></b> | Wide ResNet-50,<br>Wide ResNet101                           | Kather 100k <sup>2</sup> ,<br>PCam <sup>3</sup> | Supplementary Table 2 |
| <b>DenseNet<sup>7</sup></b>    | DenseNet121,<br>DenseNet161,<br>DenseNet169,<br>DenseNet201 | Kather 100k <sup>2</sup> ,<br>PCam <sup>3</sup> | Supplementary Table 2 |
| <b>MobileNet<sup>8,9</sup></b> | MobileNet-v2,<br>MobileNet-v3 small,<br>MobileNet-v3 large  | Kather 100k <sup>2</sup> ,<br>PCam <sup>3</sup> | Supplementary Table 2 |
| <b>GoogLeNet<sup>10</sup></b>  | GoogLeNet                                                   | Kather 100k <sup>2</sup> ,<br>PCam <sup>3</sup> | Supplementary Table 2 |

## Supplementary Table 2

*Patch classification performance of models provided by TIAToolbox on both the Kather100K and Patch Camelyon (PCam) datasets.*

|                                         | <b>Kather100K F<sub>1</sub></b> | <b>PCam F<sub>1</sub></b> |
|-----------------------------------------|---------------------------------|---------------------------|
| <b>AlexNet<sup>1</sup></b>              | 0.965                           | 0.840                     |
| <b>ResNet18<sup>4</sup></b>             | 0.990                           | 0.888                     |
| <b>ResNet34<sup>4</sup></b>             | 0.991                           | 0.889                     |
| <b>ResNet50<sup>4</sup></b>             | 0.989                           | 0.892                     |
| <b>ResNet101<sup>4</sup></b>            | 0.989                           | 0.888                     |
| <b>ResNeXt50 32x4d<sup>5</sup></b>      | 0.992                           | 0.900                     |
| <b>ResNeXt101 32x8d<sup>5</sup></b>     | 0.991                           | 0.892                     |
| <b>Wide ResNet50<sup>6</sup></b>        | 0.989                           | 0.901                     |
| <b>Wide ResNet101<sup>6</sup></b>       | 0.990                           | 0.898                     |
| <b>DenseNet121<sup>7</sup></b>          | 0.993                           | 0.897                     |
| <b>DenseNet161<sup>7</sup></b>          | 0.992                           | 0.893                     |
| <b>DenseNet169<sup>7</sup></b>          | 0.992                           | 0.895                     |
| <b>DenseNet201<sup>7</sup></b>          | 0.991                           | 0.891                     |
| <b>GoogLeNet<sup>10</sup></b>           | 0.990                           | 0.899                     |
| <b>MobileNet v2<sup>8,9</sup></b>       | 0.991                           | 0.895                     |
| <b>MobileNet v3 large<sup>8,9</sup></b> | 0.992                           | 0.890                     |
| <b>MobileNet v3 small<sup>8,9</sup></b> | 0.992                           | 0.867                     |

### Supplementary Table 3

Semantic segmentation performance (Sørensen–Dice score) on the Breast Cancer Semantic Segmentation (BCSS) dataset. Here, we use a U-Net model with a ResNet50 encoder.

|                                         | Tumor | Stroma | Inflammatory | Necrosis | Other | All   |
|-----------------------------------------|-------|--------|--------------|----------|-------|-------|
| <b>Amgad <i>et al.</i><sup>11</sup></b> | 0.851 | 0.800  | 0.712        | 0.723    | 0.666 | 0.750 |
| <b>TIAToolbox</b>                       | 0.885 | 0.825  | 0.761        | 0.765    | 0.581 | 0.763 |

### Supplementary Table 4

Performance of IDaRS provided as part of TIAToolbox, compared to the original implementation.

|                                         | MSI   | TP53  | BRAF  | CIMP  | CIN   | HM    |
|-----------------------------------------|-------|-------|-------|-------|-------|-------|
| <b>Bilal <i>et al.</i><sup>12</sup></b> | 0.828 | 0.755 | 0.813 | 0.853 | 0.860 | 0.846 |
| <b>TIAToolbox</b>                       | 0.870 | 0.747 | 0.750 | 0.748 | 0.810 | 0.790 |

### Supplementary Table 5

Performance of SlideGraph+ using five-fold cross-validation provided as part of TIAToolbox, compared to the original implementation. Here we report the mean and the standard deviation across the folds.

|                                    | HER2        | ER          |
|------------------------------------|-------------|-------------|
| <b>Lu <i>et al.</i> (original)</b> | 0.710±0.020 | -           |
| <b>TIAToolbox</b>                  | 0.738±0.043 | 0.872±0.023 |

### Supplementary Table 6

Detailed metrics of Models for semantic segmentation.

| Model Family                  | Architecture Variants    | Training Dataset(s)                           | Metric(s)                            |
|-------------------------------|--------------------------|-----------------------------------------------|--------------------------------------|
| <b>UNet<sup>13</sup></b>      | ResNet-50 backbone       | TCGA-BCSS                                     | Supplementary Table 3                |
| <b>HoVer-Net<sup>14</sup></b> | HoVer-Net+ <sup>15</sup> | Private oral dysplasia cohort (not available) | Shephard <i>et al.</i> <sup>15</sup> |

### Supplementary Table 7

Detailed metrics of Models for nucleus segmentation or classification.

| Model Family                  | Architecture Variants            | Training Dataset(s)                                                                                                                                                           | Metric(s)                                                                                                              |
|-------------------------------|----------------------------------|-------------------------------------------------------------------------------------------------------------------------------------------------------------------------------|------------------------------------------------------------------------------------------------------------------------|
| <b>HoVer-Net<sup>14</sup></b> | Original,<br>Fast,<br>HoVer-Net+ | Kumar (MoNuSeg Subset) <sup>16</sup> ,<br>PanNuke <sup>17,18</sup> ,<br>CoNSeP <sup>14</sup> ,<br>MoNuSAC <sup>19</sup> ,<br>Private oral dysplasia cohort<br>(not available) | Graham <i>et al.</i> <sup>14</sup> ,<br>Gamper <i>et al.</i> <sup>18</sup> ,<br>Shephard <i>et al.</i> <sup>15</sup> , |

## Supplementary Table 8

*Whole slide classification.*

| <b>Model Family</b> | <b>Architecture Variants</b>              | <b>Training Dataset(s)</b> | <b>Metric(s)</b>                                         |
|---------------------|-------------------------------------------|----------------------------|----------------------------------------------------------|
| <b>IDaRS</b>        | ResNet-18 (tumor)<br>ResNet-34 (mutation) | TCGA-COAD                  | Supplementary Table 4                                    |
| <b>SlideGraph</b>   | SlideGraph+                               | TCGA-BRCA                  | Supplementary Table 5,<br>Lu <i>et al.</i> <sup>20</sup> |

## Supplementary References

1. Krizhevsky, A., Sutskever, I. & Hinton, G.E. Imagenet classification with deep convolutional neural networks. *Advances in neural information processing systems* **25**, 1097-1105 (2012).
2. Kather, J.N., *et al.* Predicting survival from colorectal cancer histology slides using deep learning: A retrospective multicenter study. *PLoS medicine* **16**, e1002730 (2019).
3. Veeling, B.S., Linmans, J., Winkens, J., Cohen, T. & Welling, M. Rotation equivariant cnns for digital pathology. in *International Conference on Medical image computing and computer-assisted intervention* 210-218 (Springer, 2018).
4. He, K., Zhang, X., Ren, S. & Sun, J. Deep residual learning for image recognition. in *Proceedings of the IEEE conference on computer vision and pattern recognition* 770-778 (2016).
5. Xie, S., Girshick, R., Dollár, P., Tu, Z. & He, K. Aggregated residual transformations for deep neural networks. in *Proceedings of the IEEE conference on computer vision and pattern recognition* 1492-1500 (2017).
6. Zagoruyko, S. & Komodakis, N. Wide residual networks. *Preprint at <https://arxiv.org/abs/1605.07146>* (2016).
7. Huang, G., Liu, Z., Van Der Maaten, L. & Weinberger, K.Q. Densely connected convolutional networks. in *Proceedings of the IEEE conference on computer vision and pattern recognition* 4700-4708 (2017).
8. Howard, A., *et al.* Searching for mobilenetv3. in *Proceedings of the IEEE/CVF International Conference on Computer Vision* 1314-1324 (2019).
9. Sandler, M., Howard, A., Zhu, M., Zhmoginov, A. & Chen, L.-C. Mobilenetv2: Inverted residuals and linear bottlenecks. in *Proceedings of the IEEE conference on computer vision and pattern recognition* 4510-4520 (2018).
10. Szegedy, C., *et al.* Going deeper with convolutions. in *Proceedings of the IEEE conference on computer vision and pattern recognition* 1-9 (2015).
11. Amgad, M., *et al.* Structured crowdsourcing enables convolutional segmentation of histology images. *Bioinformatics* **35**, 3461-3467 (2019).
12. Bilal, M., *et al.* Development and validation of a weakly supervised deep learning framework to predict the status of molecular pathways and key mutations in colorectal cancer from routine histology images: a retrospective study. *The Lancet Digital Health* **3**(2021).
13. Long, J., Shelhamer, E. & Darrell, T. Fully convolutional networks for semantic segmentation. in *Proceedings of the IEEE conference on computer vision and pattern recognition* 3431-3440 (2015).
14. Graham, S., *et al.* Hover-net: Simultaneous segmentation and classification of nuclei in multi-tissue histology images. *Medical Image Analysis* **58**, 101563 (2019).
15. Shephard, A.J., *et al.* Simultaneous Nuclear Instance and Layer Segmentation in Oral Epithelial Dysplasia. in *Proceedings of the IEEE/CVF International Conference on Computer Vision* 552-561 (2021).
16. Kumar, N., *et al.* A Multi-Organ Nucleus Segmentation Challenge. *IEEE Transactions on Medical Imaging* **39**, 1380-1391 (2020).
17. Gamper, J., Alemi Koohbanani, N., Benet, K., Khuram, A. & Rajpoot, N. PanNuke: An Open Pan-Cancer Histology Dataset for Nuclei Instance Segmentation and Classification. 11-19 (Springer International Publishing, Cham, 2019).
18. Gamper, J., *et al.* Pannuke dataset extension, insights and baselines. *Preprint at <https://arxiv.org/abs/2003.10778>* (2020).
19. Verma, R., *et al.* MoNuSAC2020: A Multi-organ Nuclei Segmentation and Classification Challenge. *IEEE Transactions on Medical Imaging* **40**, 3413 - 3423 (2021).

20. Lu, W., Toss, M., Rakha, E., Rajpoot, N. & Minhas, F. SlideGraph+: Whole Slide Image Level Graphs to Predict HER2Status in Breast Cancer. *Preprint at <https://arxiv.org/abs/2110.06042>* (2021).
